# Supplementary material for: Novel Sandwich-Structured Hollow Fiber Membrane for High-Efficiency Membrane Distillation and Scale-Up for Pilot Validation
Source: MDPI journal article supplement (doi:10.3390/membranes12040423), 2022-04-14
Supplement: s1 [file s1]

### Supplementary Materials

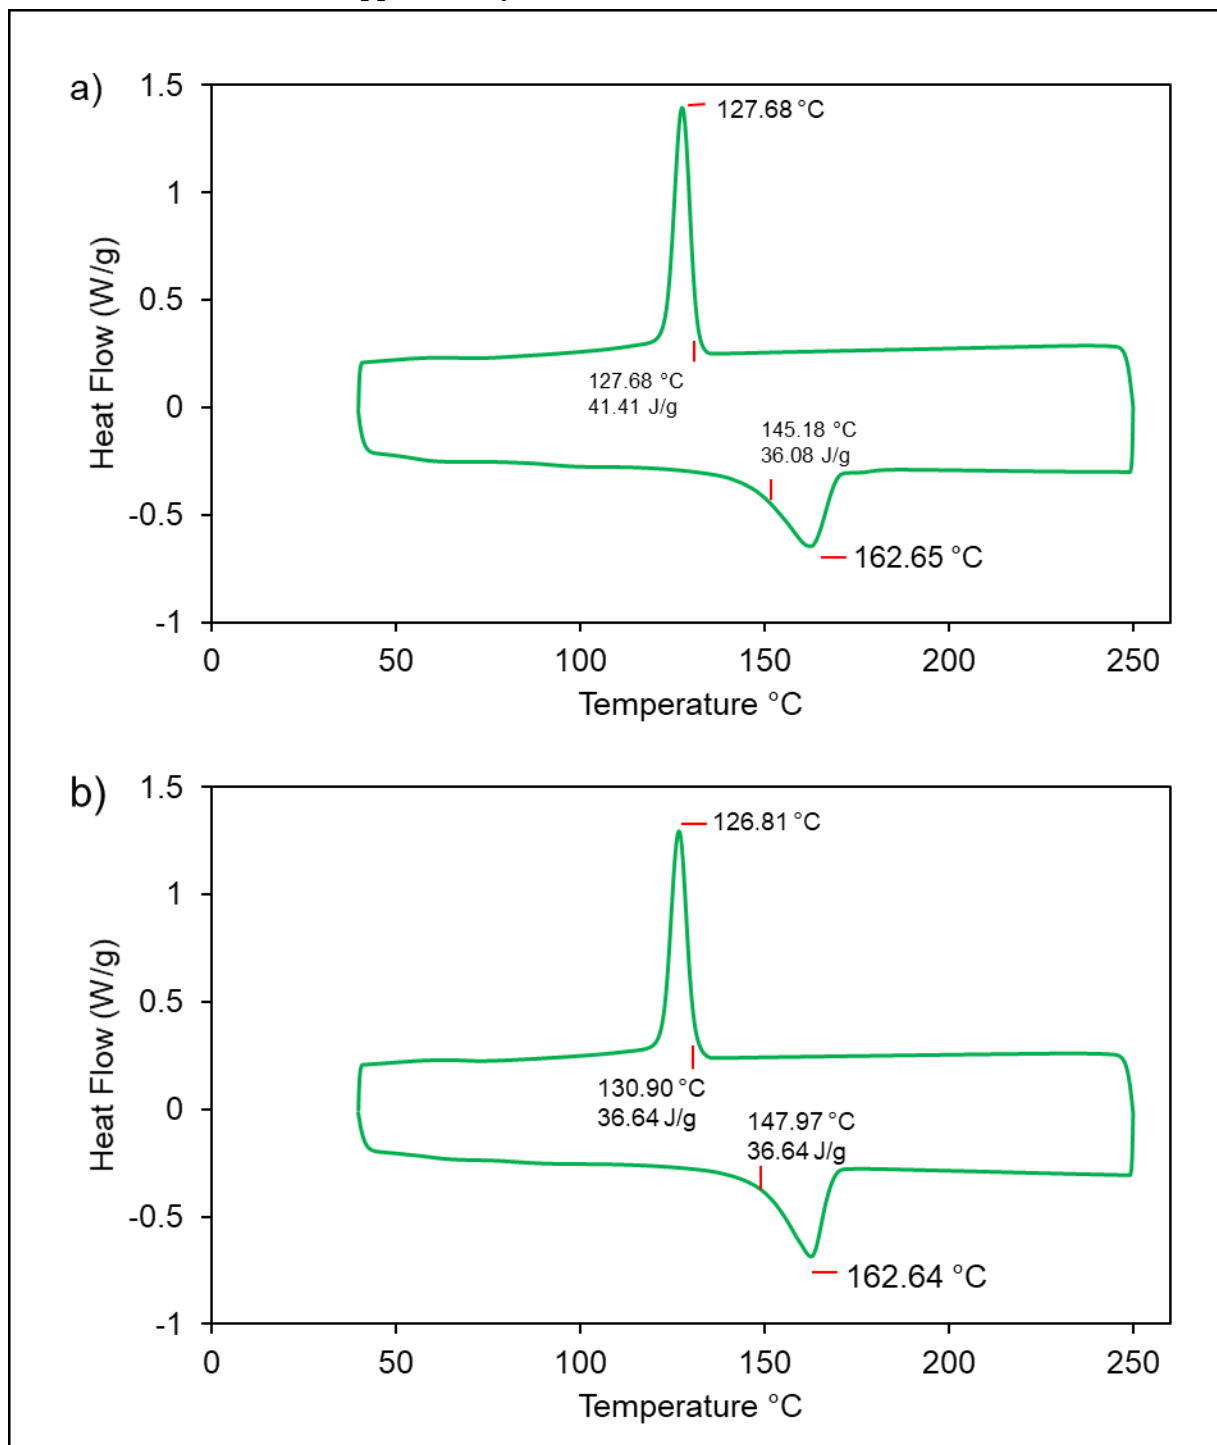

Figure S1. **Differential Scanning Calorimetry (DSC)** of different PVDF powders used for Hollow fiber membrane manufacture. (a) PVDF 1, USA-origin; (b) PVDF 2, China-origin.

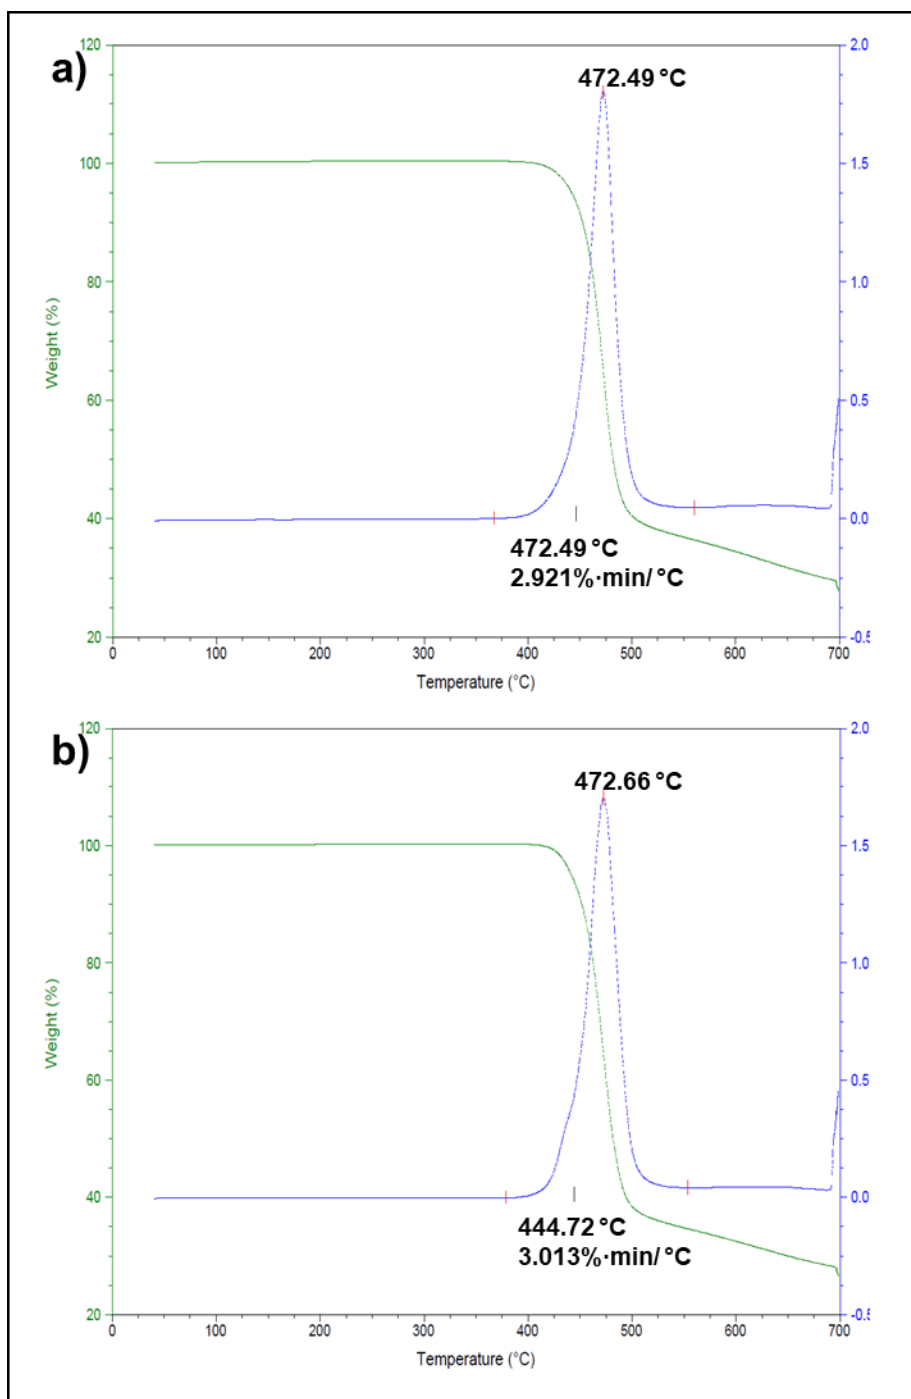

Figure S2. Thermogravimetric analysis (TGA) of different PVDF powders used for Hollow fiber membrane manufacture. (a) PVDF 1, USA-origin; (b) PVDF 2, China-origin.

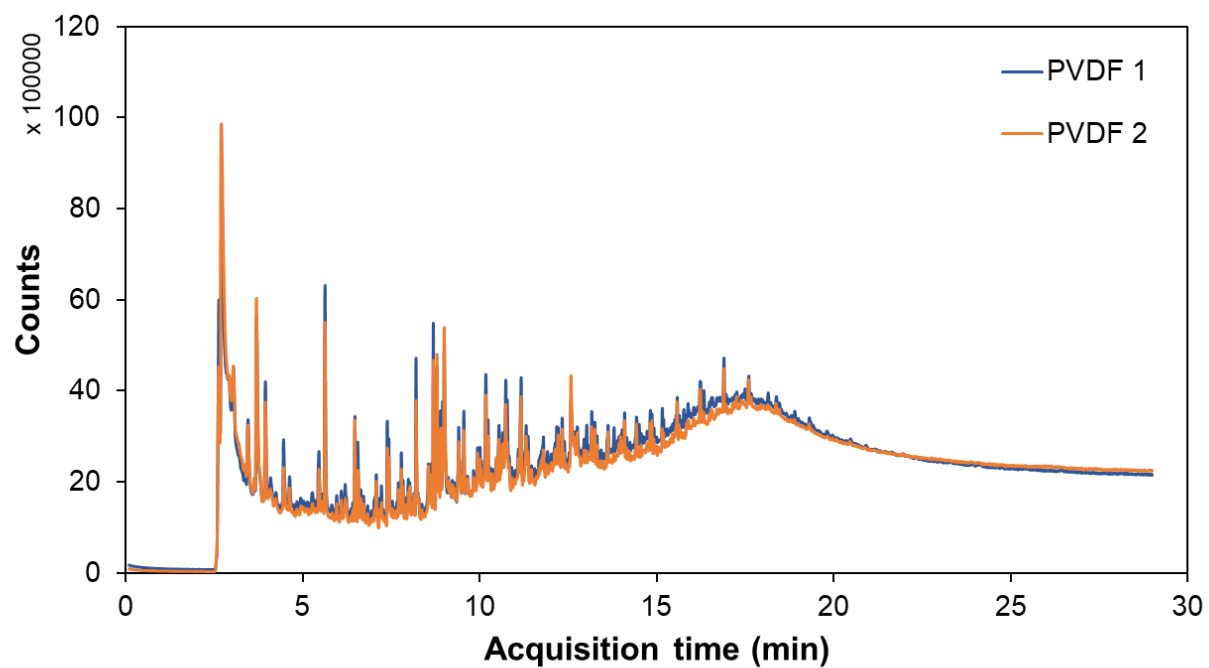

Figure S3. Pyrolysis-GCMS chromatograms of PVDF at 600 °C. Orange- PVDF 1; Green – PVDF 2.

Table S1. Characteristics of manufactured hollow fibers. FR: flowrate; CB: coagulation bath; ID: internal diameter; OD: outer diameter.

| Polymer | Batch sample | Bore FR (mL/min) | CB (°C)    | OD (mm)     | ID (mm)     | Porosity (%) | Contact Angle (°) |
|---------|--------------|------------------|------------|-------------|-------------|--------------|-------------------|
| PVDF 1  | B1-a         | 1.5              | ≈ 24       | 1.13 ± 0.01 | 0.73 ± 0.01 | n/a          | 69.3              |
|         | B1-b         | 3.0              | ≈ 24       | 1.29 ± 0.02 | 0.95 ± 0.01 | n/a          | 77.2              |
|         | B1-c         | 4.5              | ≈ 24       | 1.38 ± 0.01 | 1.09 ± 0.01 | n/a          | 72.3              |
|         | B1-d         | 1.5              | 38.3       | 1.12 ± 0.01 | 0.70 ± 0.00 | n/a          | 66.6              |
|         | B1-e         | 3.0              | 38.3       | 1.25 ± 0.03 | 0.89 ± 0.01 | n/a          | 64.1              |
|         | B3-a         | 3.0              | 38.3       | 1.04 ± 0.01 | 0.63 ± 0.01 | 75.55 ± 0.2  | 72.0              |
|         | B3-b         | 1.5              | 38.3       | 0.98 ± 0.01 | 0.61 ± 0.01 | 75.85 ± 0.3  | 72.1              |
|         | B4-a         | 4.5              | 39.2       | 1.26 ± 0.01 | 0.83 ± 0.02 | 82.6 ± 0.2   | 80.1              |
|         | B4-b         | 6.8              | 39.2       | 1.19 ± 0.01 | 0.72 ± 0.01 | 82.5 ± 0.3   | 79.8              |
|         | B6-a         | 4.5              | 38.2       | 1.16 ± 0.01 | 0.74 ± 0.03 | 79.9 ± 0.2   | 82.6              |
|         | B6-b         | 6.8              | 38.2       | 1.26 ± 0.02 | 0.84 ± 0.02 | 82.2 ± 0.3   | 83.3              |
|         | B8-B12       | 4.5              | 37.4 ± 0.7 | 1.14 ± 0.01 | 0.67 ± 0.01 | n/a          | n/a               |
| PVDF 2  | B2-f         | 4.5              | 38.6       | 1.07 ± 0.02 | 0.66 ± 0.03 | 77.5 ± 0.2   | 70.6              |
|         | B2-g         | 6.8              | 38.6       | 1.16 ± 0.01 | 0.79 ± 0.01 | 77.5 ± 0.2   | 72.6              |
|         | B2-h         | 9.0              | 38.6       | 1.25 ± 0.01 | 0.90 ± 0.01 | n/a          | n/a               |
|         | B5-a         | 4.5              | 38.2       | 1.14 ± 0.03 | 0.75 ± 0.01 | 79.1 ± 0.2   | 72.8              |
|         | B5-b         | 6.8              | 38.2       | 1.28 ± 0.03 | 0.91 ± 0.01 | 81.2 ± 0.3   | 75.9              |
|         | B7           | 4.5-6.8          | 38.2       | 1.16 ± 0.01 | 0.73 ± 0.02 | n/a          | n/a               |

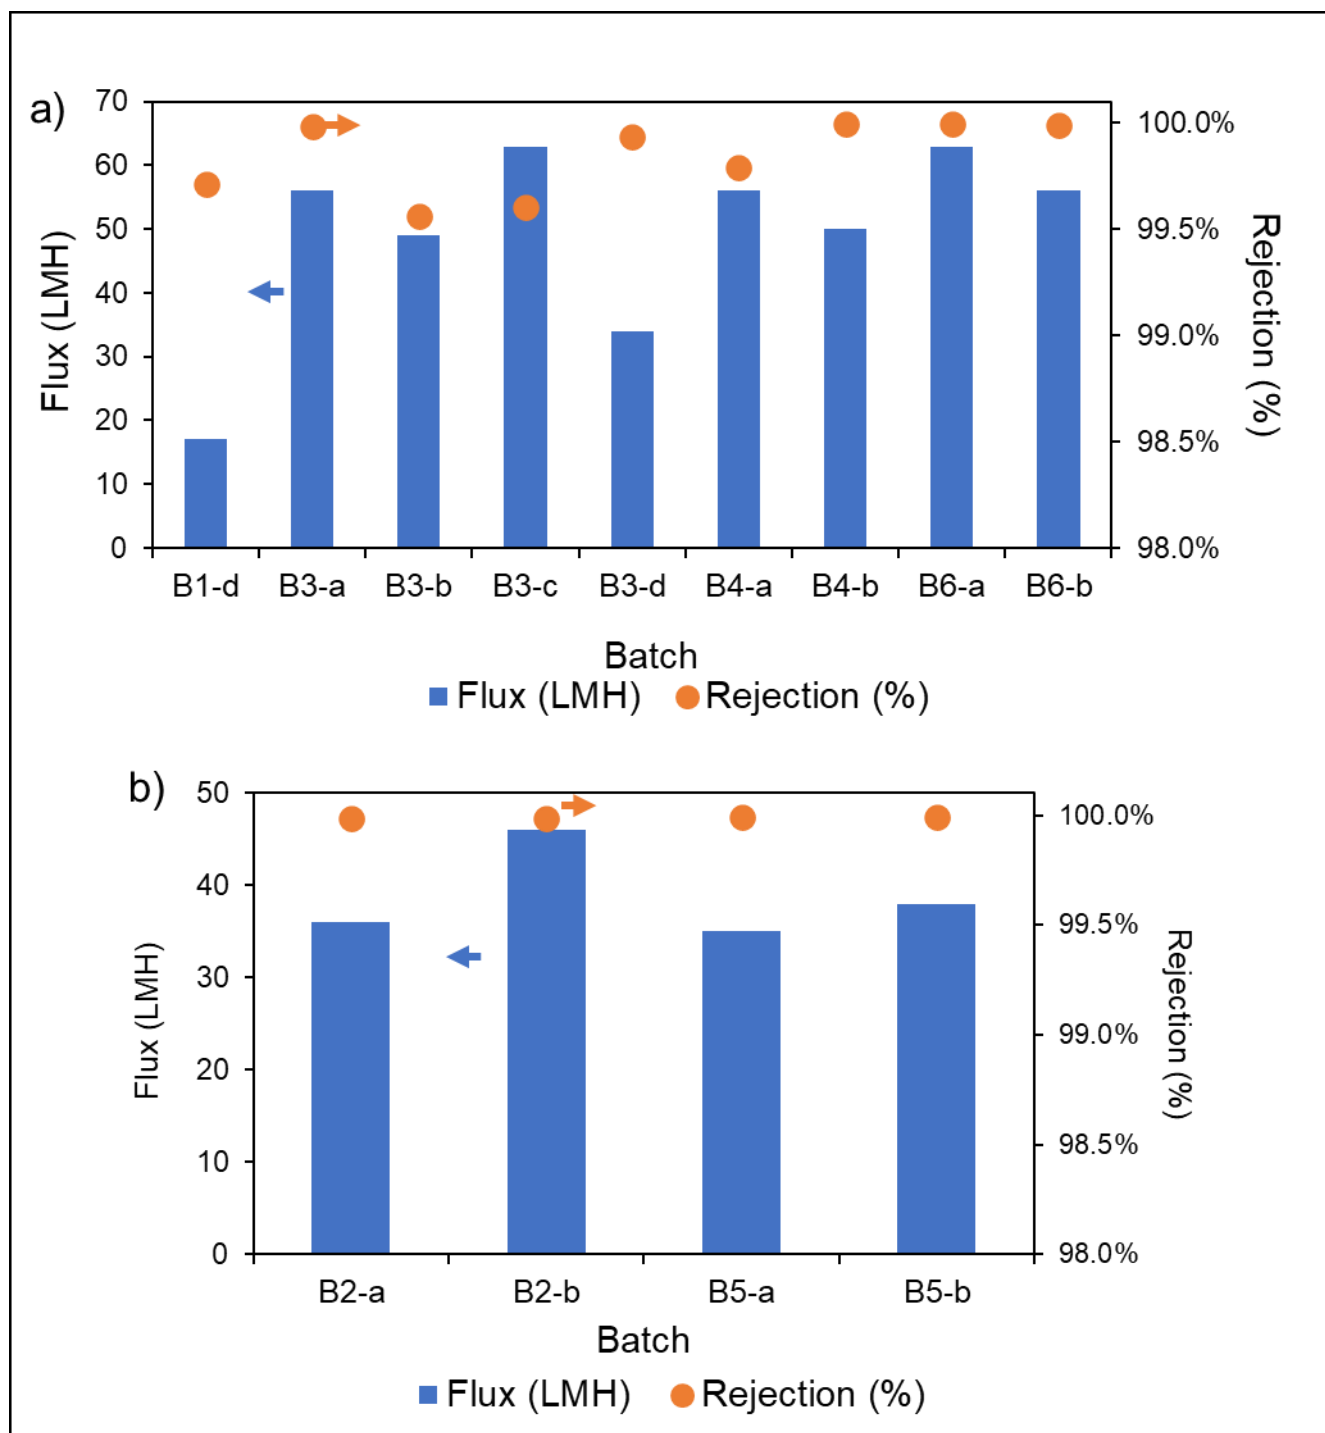

Figure S4. Flux and Rejection of VMD tests in each batch. All tests were performed for a time  $\geq 1$  hr and using 0.5-in modules. Descending values based on flux, L/m<sup>2</sup>.hr (LMH). (a) Fibers made with PVDF 1 dope; (b) Fibers made with PVDF 2 dope.
